# Supplementary material for: Extra-Cellular Vesicles Derived from Thyroid Cancer Cells Promote the Epithelial to Mesenchymal Transition (EMT) and the Transfer of Malignant Phenotypes through Immune Mediated Mechanisms
Source: MDPI journal article supplement (doi:10.3390/ijms24032754), 2023-02-01
Supplement: s1 [file s1]

**Figure S1 supplementary**

**Cytofluorimetric characterization of exosomes.**

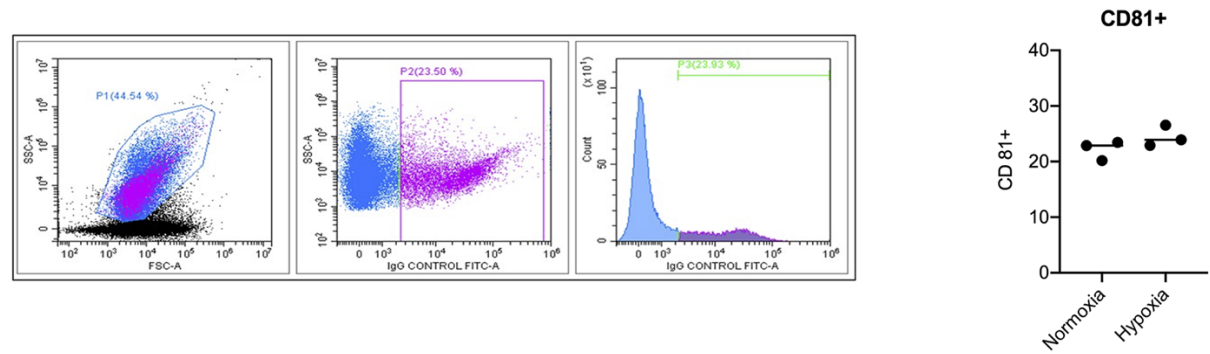

EVs obtained from CAL-62 supernatants, as described in Materials and methods, were labelled with FITC-CD81. Representative experiment showing that 24% of EVs were positive for CD81. Graph shows results obtained from 3 independent determinations.

## Figure S2 supplementary

### Expression of HIF 1 $\alpha$ related proteins in CAL-62 cells and in BCPAP cells treated with CAL-62 EVs.

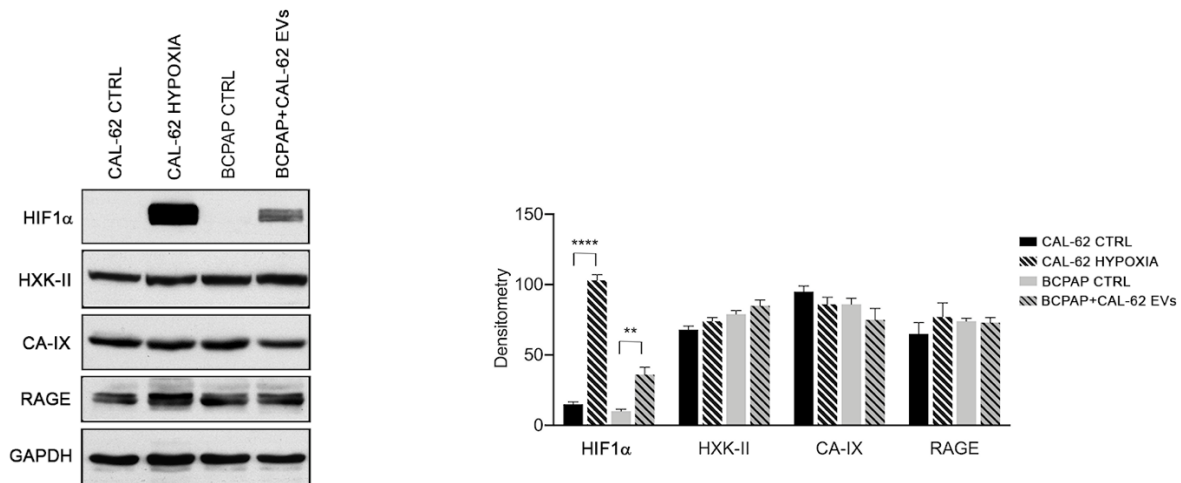

HIF 1 $\alpha$ , HXK-II, CA IX and RAGE protein levels by western blot analysis, normalized with GADPH. In order to find out if the EMT phenotype was induced by HIF 1 $\alpha$  even in normoxic conditions, we studied the expression of HXK, CAIX and RAGE that are induced during hypoxia (1). It is interesting to note that only HIF 1  $\alpha$  is induced in BCPAP cells treated with EVs obtained from CAL-62 cells cultured under hypoxic conditions and that none of the HIF 1 $\alpha$  targets are induced in BCPAP cells after 24 h of CAL-62-EVs exposure. Asterisks indicate P values \*P < 0.05, \*\*P < 0.01, \*\*\*P < 0.005, and \*\*\*\*P < 0.0001. Data are presented as mean  $\pm$  s.d. from triplicate experiments
